# Supplementary material for: Predicting the Potential Distribution of Pine Wilt Disease in China under Climate Change
Source: MDPI journal article supplement (doi:10.3390/insects13121147), 2022-12-12
Supplement: s1 [file s1]

## Article

# Predicting the Potential Distribution of Pine Wilt Disease in China under Climate Change

Xianheng Ouyang <sup>1</sup>, Anliang Chen <sup>1</sup>, Yan Li <sup>2</sup>, Xiaoxiao Han <sup>3</sup> and Haiping Lin <sup>1,\*</sup>

<sup>1</sup> School of Forestry and Biotechnology, Zhejiang A&F University, Hangzhou 311300, China; oyxianheng@163.com (X.O.); anlchen@126.com (A.C.)

<sup>2</sup> Collaborative Innovation Center of Sustainable Forestry, Nanjing Forestry University, Nanjing 210037, China; lyle@njfu.edu.cn

<sup>3</sup> College of Plant Protection, Northwest A&F University, Xianyang 712100, China; hxldlife233@163.com

\* Correspondence: hplin@zafu.edu.cn

**Table S1.** 19 Bioclimatic factors in the research.

| Variables | Description                                                        | Variables | Description                                     |
|-----------|--------------------------------------------------------------------|-----------|-------------------------------------------------|
| bio1      | Annual mean temperature                                            | bio11     | Mean temperature of coldest quarter             |
| bio2      | Mean diurnal range (mean of monthly (maximum-minimum temperature)) | bio12     | Annual rainfall                                 |
| bio3      | Isothermality (bio2/bio7) ( $\times 100$ )                         | bio13     | Rainfall of wettest month                       |
| bio4      | Temperature seasonality (standard deviation $\times 100$ )         | bio14     | Rainfall in driest month                        |
| bio5      | The maximum temperature of warmest month                           | bio15     | Rainfall seasonality (coefficient of variation) |
| bio6      | The minimum temperature of coldest month                           | bio16     | Rainfall of wettest quarter                     |
| bio7      | Temperature annual range (bio5-bio6)                               | bio17     | Rainfall of driest quarter                      |
| bio8      | Mean temperature of wettest quarter                                | bio18     | Rainfall of warmest quarter                     |
| bio9      | Mean temperature of driest quarter                                 | bio19     | Rainfall of coldest quarter                     |
| bio10     | Mean temperature of warmest quarter                                |           |                                                 |

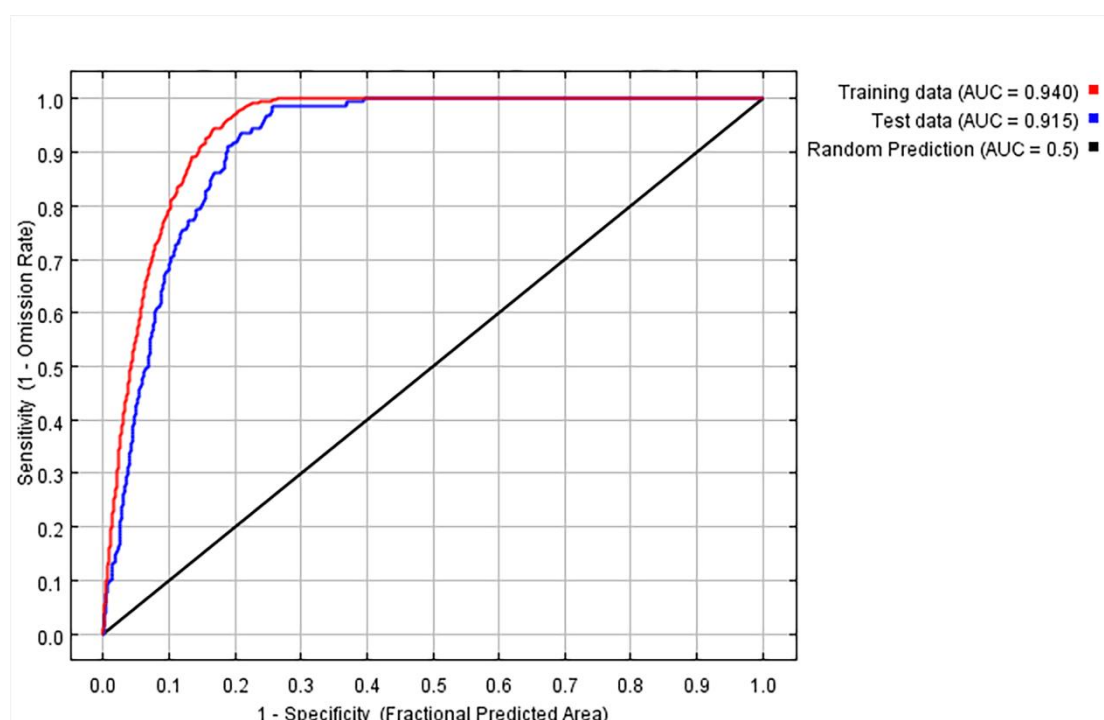

**Figure S1.** ROC response curve under the MaxEnt model.

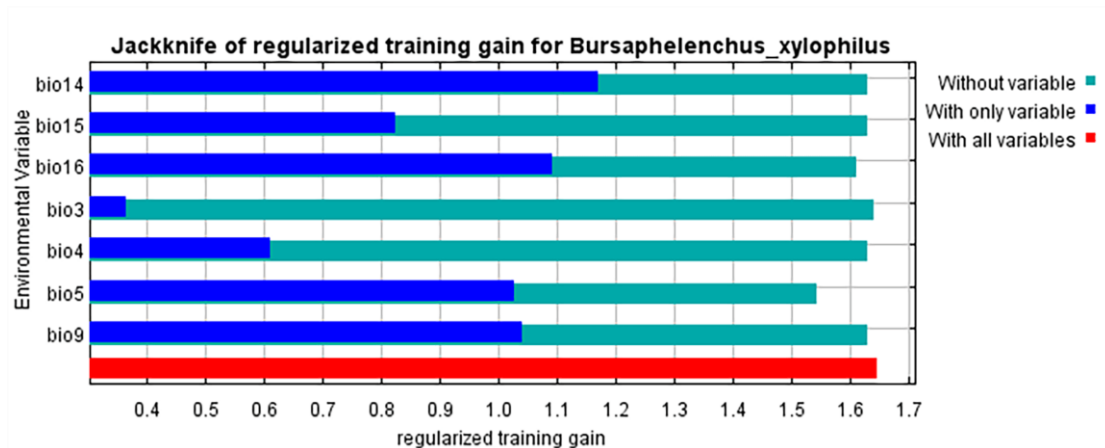

**Figure S2.** Jackknife test of climatic factors for pine wilt disease.

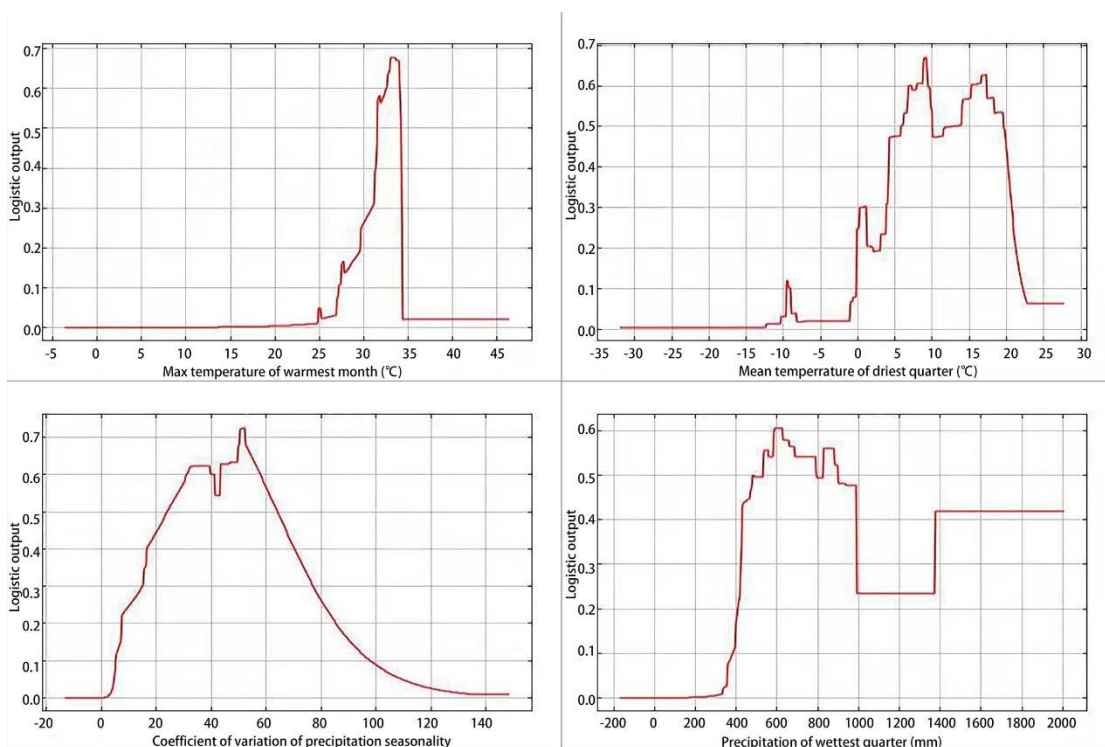

**Figure S3.** Response curves of the main climate factors affecting distribution of pine wilt disease.
